# Supplementary material for: Exploring Lifestyle and Dietary Patterns in Pregnancy and Their Impact on Health: A Comparative Analysis of Two Distinct Groups 10 Years Apart
Source: MDPI journal article supplement (doi:10.3390/nu16030377), 2024-01-27
Supplement: s1 [file s1]

**Table S1.** Descriptive characteristics of pregnant women.

|                              |      | Percentiles |       |        |      |         |         |       |       |       |
|------------------------------|------|-------------|-------|--------|------|---------|---------|-------|-------|-------|
|                              |      | N           | Mean  | Median | SD   | Minimum | Maximum | 25th  | 50th  | 75th  |
| Age (years old)              | 2013 | 400         | 27.58 | 28     | 5.72 | 15      | 52      | 23    | 28    | 31    |
|                              | 2023 | 251         | 26.55 | 26     | 5.44 | 18      | 40      | 22.5  | 26    | 30    |
| Pre-gestational              | 2013 | 387         | 22.37 | 21.33  | 3.96 | 14.69   | 44.98   | 19.57 | 21.32 | 24.43 |
| BMI (kg/m <sup>2</sup> )     | 2023 | 244         | 25.06 | 24.35  | 5.24 | 15.42   | 45      | 21.1  | 24.35 | 27.59 |
| Gestational weight gain (kg) | 2013 | 382         | 14.2  | 14     | 5.15 | 0       | 30      | 10    | 14    | 17    |
|                              | 2023 | 244         | 8.34  | 6.7    | 8.47 | -8.1    | 41      | 2     | 6.7   | 12.23 |
| No of pregnancies            | 2013 | 400         | 2.38  | 2      | 1.71 | 1       | 13      | 1     | 2     | 3     |
|                              | 2023 | 251         | 1.73  | 1      | 0.94 | 1       | 5       | 1     | 1     | 2     |
| Gestational age (weeks)      | 2013 | 400         | 38.57 | 39     | 1.34 | 31      | 42      | 38    | 39    | 40    |
|                              | 2023 | 251         | 38.55 | 39     | 1.39 | 34      | 42      | 38    | 39    | 40    |

N=number; SD=standard deviation.

**Table S2.** The average daily intake of energy and nutrients in the 2 groups

|             | Year | N   | Mean    | Median  | SD      | IQR     | Min    | Max      | Percentile |         |         | p      | p <sup>1</sup> | p <sup>2</sup> |
|-------------|------|-----|---------|---------|---------|---------|--------|----------|------------|---------|---------|--------|----------------|----------------|
|             |      |     |         |         |         |         |        |          | 25th       | 50th    | 75th    |        |                |                |
| Energy_kcal | 2013 | 400 | 1835.92 | 1796.14 | 463.46  | 559.33  | 214.05 | 4014.55  | 1543.06    | 1796.14 | 2102.38 | <0.001 |                | 0.36           |
|             | 2023 | 251 | 1992.53 | 1927.44 | 537.29  | 664.12  | 913.58 | 4183.99  | 1610.00    | 1927.44 | 2274.12 |        |                |                |
| Total CH    | 2013 | 400 | 212.83  | 211.20  | 60.24   | 76.16   | 16.00  | 546.62   | 171.06     | 211.20  | 247.23  | <0.001 | 0.96           | 0.9            |
|             | 2023 | 251 | 264.66  | 258.11  | 74.77   | 89.07   | 109.57 | 575.17   | 209.78     | 258.11  | 298.85  |        |                |                |
| Fiber       | 2013 | 400 | 115.15  | 114.55  | 36.53   | 48.42   | 0.07   | 291.63   | 90.06      | 114.55  | 138.47  | <0.001 | 0.99           | 0.76           |
|             | 2023 | 251 | 156.82  | 154.18  | 46.55   | 57.00   | 54.57  | 404.15   | 127.56     | 154.18  | 184.56  |        |                |                |
| Total fat   | 2013 | 400 | 75.54   | 72.29   | 23.41   | 28.89   | 12.65  | 189.53   | 59.60      | 72.29   | 88.49   | <0.001 | 0.93           | 0.86           |
|             | 2023 | 251 | 75.27   | 70.86   | 25.85   | 30.10   | 30.48  | 221.17   | 58.63      | 70.86   | 88.73   |        |                |                |
| MUFA        | 2013 | 400 | 28.50   | 26.98   | 10.35   | 11.93   | 3.67   | 89.18    | 21.72      | 26.98   | 33.65   | 0.002  | 0.51           | 0.84           |
|             | 2023 | 251 | 26.14   | 24.36   | 10.16   | 11.35   | 9.03   | 98.85    | 19.47      | 24.36   | 30.82   |        |                |                |
| PUFA        | 2013 | 400 | 11.57   | 11.13   | 3.87    | 4.90    | 0.65   | 35.18    | 8.93       | 11.13   | 13.83   | <0.001 | 0.62           | 0.09           |
|             | 2023 | 251 | 14.54   | 13.46   | 6.14    | 5.97    | 3.96   | 65.26    | 10.66      | 13.46   | 16.64   |        |                |                |
| SFA         | 2013 | 400 | 28.24   | 26.82   | 8.74    | 10.38   | 7.27   | 83.39    | 22.34      | 26.82   | 32.72   | <0.001 | 0.23           | 0.88           |
|             | 2023 | 251 | 27.75   | 26.15   | 10.17   | 12.81   | 9.71   | 61.89    | 20.59      | 26.15   | 33.40   |        |                |                |
| Cholesterol | 2013 | 400 | 398.76  | 383.88  | 152.91  | 173.55  | 41.02  | 1201.02  | 306.82     | 383.88  | 480.36  | 0.001  | 0.51           | 0.72           |
|             | 2023 | 251 | 362.96  | 346.04  | 139.94  | 165.49  | 80.11  | 987.85   | 267.90     | 346.04  | 433.40  |        |                |                |
| Protein     | 2013 | 400 | 89.00   | 85.88   | 28.58   | 33.45   | 9.99   | 281.67   | 69.86      | 85.88   | 103.31  | <0.001 | 0.26           | 0.605          |
|             | 2023 | 251 | 80.41   | 77.87   | 21.68   | 28.62   | 35.22  | 155.61   | 64.94      | 77.87   | 93.56   |        |                |                |
| Carotene    | 2013 | 400 | 2010.96 | 1634.42 | 1248.99 | 1325.72 | 119.09 | 10333.09 | 1204.18    | 1634.42 | 2529.89 | <0.001 | 0.67           | 0.69           |
|             | 2023 | 251 | 3668.11 | 3826.53 | 2510.34 | 3731.25 | 106.35 | 18035.86 | 1494.32    | 3826.53 | 5225.57 |        |                |                |
| Retinol     | 2013 | 400 | 2464.41 | 1254.56 | 3385.45 | 1752.38 | 152.36 | 29242.93 | 488.97     | 1254.56 | 2241.35 | <0.001 | 0.03           | 0.05           |
|             | 2023 | 251 | 755.94  | 361.65  | 975.60  | 743.09  | 45.49  | 5371.35  | 247.72     | 361.65  | 990.81  |        |                |                |
| VitaminB1   | 2013 | 400 | 1.35    | 1.31    | 0.40    | 0.50    | 0.10   | 3.20     | 1.09       | 1.31    | 1.59    | 0.23   | 0.22           | 0.44           |
|             | 2023 | 251 | 1.32    | 1.28    | 0.40    | 0.54    | 0.53   | 2.72     | 1.02       | 1.28    | 1.57    |        |                |                |
| VitaminB2   | 2013 | 400 | 2.15    | 1.87    | 1.02    | 1.17    | 0.51   | 8.89     | 1.47       | 1.87    | 2.64    | <0.001 | 0.17           | 0.17           |
|             | 2023 | 251 | 1.53    | 1.42    | 0.59    | 0.77    | 0.49   | 3.68     | 1.08       | 1.42    | 1.85    |        |                |                |
| VitaminB3   | 2013 | 400 | 23.01   | 21.79   | 8.95    | 9.85    | 0.53   | 87.77    | 17.23      | 21.79   | 27.07   | <0.001 | 0.39           | 0.81           |
|             | 2023 | 251 | 19.92   | 19.34   | 6.23    | 7.24    | 7.86   | 42.57    | 15.98      | 19.34   | 23.22   |        |                |                |
| VitaminB6   | 2013 | 400 | 1.92    | 1.87    | 0.56    | 0.76    | 0.21   | 4.49     | 1.52       | 1.87    | 2.28    | 0.34   | 0.43           | 0.37           |

|            |      |     |         |         |        |         |         |         |         |         |         |        |        |        |
|------------|------|-----|---------|---------|--------|---------|---------|---------|---------|---------|---------|--------|--------|--------|
|            | 2023 | 251 | 1.89    | 1.80    | 0.56   | 0.76    | 0.77    | 4.41    | 1.50    | 1.80    | 2.25    |        |        |        |
| VitaminB12 | 2013 | 400 | 11.26   | 7.86    | 11.46  | 7.54    | 1.17    | 101.53  | 4.93    | 7.86    | 12.47   | <0.001 | <0.001 | 0.013  |
|            | 2023 | 251 | 4.94    | 4.01    | 3.78   | 3.38    | 0.44    | 24.78   | 2.71    | 4.01    | 6.09    |        |        |        |
| Folate     | 2013 | 400 | 247.39  | 229.64  | 81.83  | 106.02  | 21.83   | 659.18  | 190.06  | 229.64  | 296.08  | <0.001 | 0.12   | 0.20   |
|            | 2023 | 251 | 210.46  | 203.18  | 62.41  | 86.17   | 93.13   | 473.65  | 162.05  | 203.18  | 248.22  |        |        |        |
| VitaminC   | 2013 | 400 | 105.70  | 87.02   | 64.80  | 57.04   | 10.92   | 420.48  | 62.72   | 87.02   | 119.75  | <0.001 | 0.08   | 0.84   |
|            | 2023 | 251 | 76.66   | 72.47   | 39.71  | 46.10   | 7.65    | 346.07  | 47.60   | 72.47   | 93.70   |        |        |        |
| VitaminD   | 2013 | 400 | 2.79    | 2.56    | 1.40   | 1.62    | 0.09    | 8.03    | 1.88    | 2.56    | 3.49    | <0.001 | 0.61   | 0.28   |
|            | 2023 | 251 | 2.09    | 1.89    | 1.15   | 1.28    | 0.25    | 7.88    | 1.34    | 1.89    | 2.62    |        |        |        |
| VitaminE   | 2013 | 400 | 10.79   | 9.91    | 4.88   | 4.79    | 0.57    | 48.93   | 7.83    | 9.91    | 12.62   | <0.001 | 0.42   | 0.51   |
|            | 2023 | 251 | 12.55   | 11.85   | 4.73   | 5.44    | 3.05    | 31.08   | 9.18    | 11.85   | 14.62   |        |        |        |
| Calcium    | 2013 | 400 | 859.30  | 843.29  | 193.55 | 222.35  | 343.19  | 1805.47 | 732.04  | 843.29  | 954.39  | <0.001 | 0.30   | 0.30   |
|            | 2023 | 251 | 812.39  | 779.39  | 318.21 | 387.40  | 222.24  | 1894.02 | 584.71  | 779.39  | 972.10  |        |        |        |
| Copper     | 2013 | 400 | 2.06    | 1.53    | 1.78   | 1.13    | 0.03    | 15.72   | 1.10    | 1.53    | 2.24    | <0.001 | <0.001 | <0.001 |
|            | 2023 | 251 | 1.31    | 1.19    | 0.60   | 0.45    | 0.47    | 4.43    | 0.98    | 1.19    | 1.43    |        |        |        |
| Iron       | 2013 | 400 | 10.12   | 9.60    | 3.42   | 3.96    | 0.27    | 27.80   | 7.90    | 9.60    | 11.86   | 0.99   | 0.21   | 0.22   |
|            | 2023 | 251 | 9.88    | 9.83    | 2.60   | 3.46    | 4.93    | 20.10   | 7.96    | 9.83    | 11.41   |        |        |        |
| Iodine     | 2013 | 400 | 131.39  | 128.72  | 33.04  | 39.19   | 44.63   | 309.45  | 109.32  | 128.72  | 148.51  | 0.81   | 0.40   | 0.42   |
|            | 2023 | 251 | 134.33  | 127.60  | 52.42  | 69.60   | 44.45   | 333.23  | 95.29   | 127.60  | 164.89  |        |        |        |
| Potassium  | 2013 | 400 | 2796.69 | 2739.65 | 706.04 | 827.90  | 464.13  | 5797.87 | 2323.00 | 2739.65 | 3150.90 | 0.01   | 0.53   | 0.62   |
|            | 2023 | 251 | 2926.99 | 2813.76 | 836.43 | 1019.57 | 1173.86 | 6710.09 | 2346.43 | 2813.76 | 3366.00 |        |        |        |
| Magnesium  | 2013 | 400 | 248.59  | 240.93  | 64.95  | 83.08   | 37.92   | 473.04  | 202.17  | 240.93  | 285.25  | 0.83   | 0.15   | 0.88   |
|            | 2023 | 251 | 251.13  | 239.62  | 70.40  | 85.18   | 107.68  | 578.37  | 201.76  | 239.62  | 286.93  |        |        |        |
| Sodium     | 2013 | 400 | 2577.43 | 2527.03 | 781.61 | 943.66  | 167.50  | 7045.86 | 2073.21 | 2527.03 | 3016.88 | <0.001 | 0.74   | 0.66   |
|            | 2023 | 251 | 2960.45 | 2923.41 | 984.57 | 1401.12 | 1069.11 | 6199.50 | 2237.04 | 2923.41 | 3638.15 |        |        |        |
| Phosphorus | 2013 | 400 | 1318.60 | 1292.61 | 337.31 | 422.84  | 281.59  | 3046.19 | 1088.51 | 1292.61 | 1511.35 | 0.01   | 0.73   | 0.77   |
|            | 2023 | 251 | 1266.76 | 1219.55 | 368.54 | 477.18  | 513.47  | 2614.82 | 994.52  | 1219.55 | 1471.71 |        |        |        |
| Selenium   | 2013 | 400 | 84.60   | 84.02   | 28.38  | 35.18   | 3.26    | 224.30  | 65.13   | 84.02   | 100.31  | <0.001 | 0.94   | 0.73   |
|            | 2023 | 251 | 77.68   | 76.93   | 21.99  | 26.53   | 28.03   | 187.31  | 63.16   | 76.93   | 89.69   |        |        |        |
| Zinc       | 2013 | 400 | 9.43    | 9.24    | 2.94   | 3.73    | 1.25    | 24.62   | 7.40    | 9.24    | 11.12   | <0.001 | 0.65   | 0.85   |
|            | 2023 | 251 | 8.34    | 7.92    | 2.45   | 3.18    | 3.99    | 18.30   | 6.52    | 7.92    | 9.69    |        |        |        |

CH=carbohydrates; MUFA=monounsaturated fatty acids; PUFA=polyunsaturated fatty acids; SFA=saturated fatty acids; p<sup>1</sup>=p adjusted for BMI; p<sup>2</sup>=p adjusted for kcal and BMI

**Table S3.** Relationships between dietary patterns and nutritional status during pregnancy.

| Parameters                  | 2013                |       | 2023                    |        |                     |       |                         |       |
|-----------------------------|---------------------|-------|-------------------------|--------|---------------------|-------|-------------------------|-------|
|                             | Pre-gestational BMI |       | Gestational weight gain |        | Pre-gestational BMI |       | Gestational weight gain |       |
|                             | r                   | p     | r                       | p      | r                   | p     | r                       | p     |
| Cereals and cereal products | 0.052               | 0.309 | 0.098                   | 0.057  | 0.125               | 0.051 | -0.003                  | 0.964 |
| Eggs and egg dishes         | 0.043               | 0.397 | 0.138                   | 0.007  | 0.133               | 0.038 | 0.031                   | 0.630 |
| Fats and oils               | 0.049               | 0.340 | 0.088                   | 0.085  | 0.076               | 0.236 | 0.200                   | 0.002 |
| Fish and fish products      | 0.002               | 0.970 | 0.141                   | 0.006  | 0.045               | 0.487 | -0.044                  | 0.492 |
| Fruit                       | 0.068               | 0.180 | 0.073                   | 0.154  | 0.005               | 0.938 | 0.032                   | 0.617 |
| Meat and meat products      | 0.031               | 0.540 | 0.052                   | 0.310  | 0.050               | 0.439 | 0.021                   | 0.742 |
| Milk and milk products      | 0.041               | 0.416 | 0.120                   | 0.019  | -0.091              | 0.157 | 0.062                   | 0.338 |
| Non-alcoholic beverages     | -0.004              | 0.931 | -0.026                  | 0.616  | 0.001               | 0.987 | 0.142                   | 0.027 |
| Nuts and seeds              | 0.072               | 0.156 | -0.069                  | 0.177  | 0.082               | 0.203 | 0.006                   | 0.926 |
| Potatoes                    | 0.102               | 0.46  | -0.066                  | 0.200  | 0.035               | 0.588 | 0.036                   | 0.573 |
| Soups and sauces            | 0.049               | 0.337 | 0.006                   | 0.909  | -0.015              | 0.810 | -0.019                  | 0.768 |
| Sugars preserves and snacks | -0.027              | 0.597 | 0.044                   | 0.394  | -0.065              | 0.310 | 0.075                   | 0.246 |
| Vegetables                  | 0.044               | 0.390 | 0.069                   | 0.176  | -0.063              | 0.325 | 0.076                   | 0.238 |
| Vegetarian 2013             | 0.039               | 0.439 | 0.086                   | 0.092  | -                   | -     | -                       | -     |
| Diverse 2013                | 0.94                | 0.066 | 0.180                   | <0.001 | -                   | -     | -                       | -     |
| Traditional 2013            | 0.128               | 0.012 | -0.049                  | 0.338  | -                   | -     | -                       | -     |
| Wholesome2023               | -                   | -     | -                       | -      | -0.016              | 0.808 | 0.064                   | 0.318 |
| Modern2023                  | -                   | -     | -                       | -      | 0.051               | 0.429 | 0.136                   | 0.034 |
| Vegetarian 2023             | -                   | -     | -                       | -      | 0.069               | 0.284 | 0.018                   | 0.777 |

**Table S4.** The relationship between dietary patterns and inadequate or excessive weight gain during pregnancy.

| GWG        |                                   | 2013  |                   | 2023                          |             |                   |
|------------|-----------------------------------|-------|-------------------|-------------------------------|-------------|-------------------|
|            |                                   | p     | OR (95% CI)       | p                             | OR (95% CI) |                   |
| Model 1    |                                   |       |                   |                               |             |                   |
| inadequate | vegetarian vs traditional pattern | 0.822 | 0.929 (0.48-1.77) | prudent vs vegetarian pattern | 0.094       | 0.487 (0.21-1.13) |
|            | balanced vs traditional pattern   | 0.898 | 0.96 (0.51-1.80)  | modern vs vegetarian pattern  | 0.012       | 0.317 (0.12-0.77) |
| excessive  | vegetarian vs traditional pattern | 0.489 | 1.229 (0.68-2.20) | prudent vs vegetarian pattern | 0.225       | 0.626 (0.29-1.33) |
|            | balanced vs traditional pattern   | 0.242 | 1.402 (0.79-2.47) | modern vs vegetarian pattern  | 0.11        | 0.543 (0.25-1.14) |
| Model 2    |                                   |       |                   |                               |             |                   |
| inadequate | environment                       | 0.572 | 1.196 (0.64-2.22) | environment                   | 0.752       | 1.136 (0.51-2.50) |
|            | age                               | 0.064 | 0.946 (0.89-1.00) | age                           | 0.428       | 0.969 (0.89-1.04) |
|            | education                         | 0.66  | 0.912 (0.60-1.37) | education                     | 0.992       | 0.998 (0.65-1.52) |
|            | smoke-status                      | 0.37  | 1.505 (0.61-3.68) | smoke-status                  | 0.726       | 0.903 (0.51-1.59) |
|            | dietary advice                    | 0.787 | 1.079 (0.62-1.87) | dietary advice                | 0.051       | 2.599 (0.99-6.79) |
|            | multiparous                       | 0.035 | 1.941 (1.04-3.6)  | multiparous                   | 0.813       | 1.144 (0.37-3.49) |
| excessive  | vegetarian vs traditional pattern | 0.907 | 1.04 (0.53-2.02)  | prudent vs vegetarian pattern | 0.062       | 0.432 (0.17-1.04) |
|            | balanced vs traditional pattern   | 0.676 | 1.151 (0.59-2.22) | modern vs vegetarian pattern  | 0.014       | 0.316 (0.12-0.79) |
|            | environment                       | 0.166 | 0.672 (0.38-1.17) | environment                   | 0.179       | 1.606 (0.80-1.13) |
|            | age                               | 0.495 | 1.017 (0.96-1.06) | age                           | 0.55        | 0.98 (0.21-3.20)  |
|            | education                         | 0.879 | 1.029 (0.70-1.49) | education                     | 0.147       | 1.31 (0.90-1.88)  |
|            | smoke-status                      | 0.543 | 0.803 (0.39-1.63) | smoke-status                  | 0.984       | 0.995 (0.62-1.59) |
|            | dietary advice                    | 0.924 | 1.024 (0.63-1.64) | dietary advice                | 0.834       | 0.9 (0.33-2.40)   |
|            | multiparous                       | 0.849 | 1.055 (0.60-1.82) | multiparous                   | 0.895       | 0.936 (0.35-2.50) |
|            | vegetarian vs traditional pattern | 0.624 | 1.16 (0.64-2.09)  | prudent vs vegetarian pattern | 0.186       | 0.59 (0.27-1.29)  |
|            | balanced vs traditional pattern   | 0.375 | 1.303 (0.72-2.33) | modern vs vegetarian pattern  | 0.099       | 0.521 (0.24-1.13) |
| Model 3    |                                   |       |                   |                               |             |                   |
| inadequate | environment                       | 0.542 | 1.22 (0.63-2.37)  | environment                   | 0.878       | 0.938 (0.41-2.12) |
|            | age                               | 0.059 | 0.94 (0.89-1)     | age                           | 0.267       | 0.956 (0.88-1.03) |
|            | education                         | 0.545 | 0.89 (0.59-1.32)  | education                     | 0.661       | 0.907 (0.58-1.40) |
|            | smoke-status                      | 0.465 | 1.41 (0.55-3.6)   | smoke-status                  | 0.795       | 0.926 (0.51-1.65) |
|            | dietary advice                    | 0.783 | 1.08 (0.62-1.88)  | dietary advice                | 0.027       | 3.045 (1.13-8.18) |

|           |                                   |       |                   |                               |       |                   |
|-----------|-----------------------------------|-------|-------------------|-------------------------------|-------|-------------------|
| excessive | multiparous                       | 0.035 | 1.946 (1.04-3.62) | multiparous                   | 0.774 | 1.18 (0.38-3.66)  |
|           | vegetarian vs traditional pattern | 0.92  | 1.03 (0.52-2.01)  | prudent vs vegetarian pattern | 0.09  | 0.456 (0.18-1.13) |
|           | balanced vs traditional pattern   | 0.64  | 1.17 (0.60-2.28)  | modern vs vegetarian pattern  | 0.03  | 0.352 (0.13-0.90) |
|           | normal weight vs obesity          | 0.256 | 0.40 (0.08-1.92)  | normal weight vs obesity      | 0.789 | 0.856 (0.27-2.68) |
|           | over weight vs obesity            | 0.014 | 0.09 (0.01-0.62)  | over weight vs obesity        | 0.109 | 2.65 (0.80-8.73)  |
|           | environment                       | 0.065 | 0.568 (0.31-1.03) | environment                   | 0.256 | 1.514 (0.74-3.09) |
|           | age                               | 0.938 | 0.998 (0.94-1.05) | age                           | 0.482 | 0.975 (0.90-1.04) |
|           | education                         | 0.762 | 1.061 (0.72-1.55) | education                     | 0.18  | 1.291 (0.24-1.13) |
|           | smoke-status                      | 0.569 | 0.80 (0.37-1.71)  | smoke-status                  | 0.65  | 1.118 (0.69-1.81) |
|           | dietary advice                    | 0.815 | 1.060 (0.64-1.72) | dietary advice                | 0.9   | 0.938 (0.34-2.54) |
|           | multiparous                       | 0.981 | 1.006 (0.57-1.77) | multiparous                   | 0.893 | 0.933 (0.33-2.57) |
|           | vegetarian vs traditional pattern | 0.596 | 1.179 (0.64-2.17) | prudent vs vegetarian pattern | 0.207 | 0.598 (0.26-1.32) |
|           | balanced vs traditional pattern   | 0.178 | 1.523 (0.82-2.8)  | modern vs vegetarian pattern  | 0.137 | 0.547 (0.24-1.21) |
|           | normal weight vs obesity          | 0.004 | 0.142 (0.03-0.53) | normal weight vs obesity      | 0.012 | 0.375 (0.17-0.80) |
|           | overweight vs obesity             | 0.093 | 0.305 (0.07-1.20) | overweight vs obesity         | 0.016 | 0.286 (0.10-0.79) |

CI = Confidence Interval ; OR = odds ratio; p=statistical significance; GWG = gestational weight gain
